1 **Title**

2 **Multi-hops functional connectivity improves individual**  
3 **prediction of fusiform face activation via a graph neural**  
4 **network**

5 Dongya Wu<sup>1</sup>, Xin Li<sup>2</sup>, Jun Feng<sup>1,3</sup>

6 <sup>1</sup>School of Information Science and Technology, Northwest University, Xi'an, 710127,  
7 China

8 <sup>2</sup>School of Mathematics, Northwest University, Xi'an, 710127, China

9 <sup>3</sup>State-Province Joint Engineering and Research Center of Advanced Networking and  
10 Intelligent Information Services, School of Information Science and Technology,  
11 Northwest University, Xi'an, 710127, China

12

13 **Corresponding authors**

14 Email addresses: lixin@nwu.edu.cn. Telephone: 029-88308119.

15

## 1 **Abstract**

2 Brain connectivity plays an important role in determining the brain region's  
3 function. Previous researchers proposed that the brain region's function is  
4 characterized by that region's input and output connectivity profiles. Following this  
5 proposal, numerous studies have investigated the relationship between connectivity  
6 and function. However, based on a preliminary analysis, this proposal is deficient in  
7 explaining individual differences in the brain region's function. To overcome this  
8 problem, we proposed that a brain region's function is characterized by that region's  
9 multi-hops connectivity profile. To test this proposal, we used multi-hops functional  
10 connectivity to predict the individual face response of the right fusiform face area  
11 (rFFA) via a multi-layers graph neural network and showed that the prediction  
12 performance is essentially improved. Results also indicated that the 2-layers graph  
13 neural network is the best in characterizing rFFA's face response and revealed a  
14 hierarchical network for the face processing of rFFA.

15

16 **Keywords:** Individual prediction, Multi-hops connectivity, Fusiform face function,  
17 Graph neural network

18

## 1 **Introduction**

2       Brain connectivity acts as the pathway for transferring information between brain  
3 regions and determines the information inflow and outflow of each cortical region.  
4 Passingham et al. (2002) proposed that the function of each cortical region can be  
5 determined by the region's input and output connectivity profiles. Mars et al. (2018)  
6 further tested and extended this proposal via the neuroimaging of connectivity, and  
7 showed that the connectivity space composed by each region's connectivity profiles  
8 provides a powerful framework in describing a brain region's function.

9       The connectivity profile can be defined in terms of the white matter pathway  
10 represented by tractography through diffusion magnetic resonance imaging (MRI), or  
11 in terms of the temporal coupling between spontaneous fluctuations of resting-state  
12 functional MRI (rfMRI) signal. Under the proposal of Passingham et al. (2002),  
13 previous studies have utilized structural connectivity (Johansen-Berg et al. 2004;  
14 Tomassini et al. 2007; Beckmann et al. 2009; Saygin et al. 2011a) or functional  
15 connectivity (Cohen et al. 2008; Gordon et al. 2016) to characterize the boundary of  
16 functionally distinct brain regions, or have utilized structural connectivity (Saygin et  
17 al. 2011b; Osher et al. 2016; Saygin et al. 2016; Wu et al. 2020) or functional  
18 connectivity (Tavor et al. 2016; Parker Jones et al. 2017) to predict the functional  
19 activation information of brain regions at various task states.

20       Though the proposal that a brain region's function is represented by the input and  
21 output connectivity profiles is widely adopted in various studies, this proposal is  
22 deficient in characterizing the individual brain region's function. Specifically, under  
23 this proposal, a brain region's function can be represented by a linear combination of  
24 the region's connectivity profiles, with the weight of the connectivity profiles viewed  
25 as the functional information transferred from neighboring regions. However, the  
26 weight of the linear model is the same for all subjects. This amounts to assume that  
27 the functional information of neighboring regions is the same for different subjects. In

1 other words, the prediction model under this proposal neglects individual differences  
2 in the functional information of neighboring regions and thus is deficient in predicting  
3 individual brain region's function.

4 To overcome this problem, we proposed that more connectivity features in the  
5 brain connectivity network should be considered. Explicitly, as shown in Fig. 1A, the  
6 functional activation information of 1-hop regions is unknown, however, the  
7 information of 1-hop regions is transferred from 2-hop regions through the  
8 connections of 1-hop regions. According to this logic, when the functional activation  
9 information of all brain regions is unknown, the connections of n-hop regions may  
10 contain functional information of the region of interest (ROI). Denote the direct input  
11 and output connections of the ROI as the 1-hop connections. The connections of the  
12 1-hop regions amount to the 2-hop connections of the ROI. We then define the  
13 ensemble of these 1-hop and 2-hop connections as the 2-hops connections relative to  
14 the ROI. Using these terms, the previous proposal (Passingham et al. 2002) is  
15 formulated as that a brain region's function is represented by the 1-hop connectivity  
16 profiles. Separately, based on the above analyses, we proposed that a brain region's  
17 function is represented by the multi-hops connectivity profiles.

18 To further test our proposal, we selected the right fusiform face area (rFFA) as the  
19 ROI. We adopted the FACES-SHAPES (emotion task) and FACE-AVG (working  
20 memory task) contrasts in the human connectome project (HCP) to define individual  
21 subject's functional face selectivity, and utilized the rfMRI data to construct  
22 individual brain functional connectivity network. Inspired by the fact that  
23 computations in the graph neural network are analogous to the propagation of  
24 functional information in the brain connectivity network, we designed a multi-layers  
25 graph neural network (Fig. 1B). This graph neural network is well suitable for our  
26 proposal because it includes both direct and indirect, single-step and multiple-step  
27 connectivity features to characterize functional selectivity of the ROI. Finally, we  
28 applied the graph neural network containing the multi-hops functional connectivity to

1 predict individual face selectivity of the rFFA.

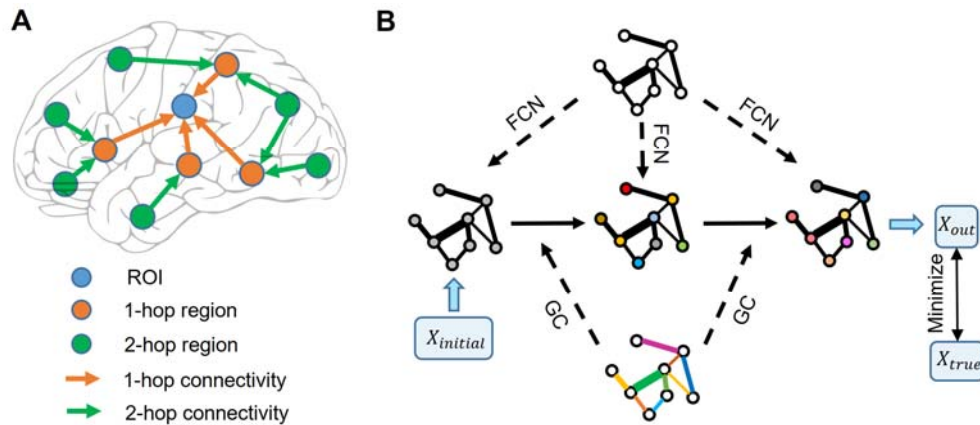

2

3 Figure 1. Schematic illustration of graph neural network. (A) Functional information  
4 of the ROI is transferred from the 1-hop neighboring regions via the 1-hop  
5 connections, and the functional information of the 1-hop neighboring regions is  
6 transferred from the 2-hop neighboring regions via the 2-hop connections. (B) Node  
7 color represents the functional information of brain regions. Edge width represents the  
8 strength of functional connectivity pathways. Edge color represents the coefficient of  
9 graph convolution (GC), i.e. the extent to which each connection participates in the  
10 functional information propagation. Initial functional information transfers within the  
11 functional connectivity network (FCN) through the graph convolution network.  
12 Coefficients of GC are trained by minimizing the error between the predicted output  
13 and true functional activation information.

## 14 **Materials and Methods**

### 15 **Human Connectome Project data**

16 We used the minimally pre-processed data (Glasser et al. 2013) provided by the  
17 HCP S1200 release. We selected all the 997 subjects that have the FACES-SHAPES,  
18 FACE-AVG task contrasts, and resting-state fMRI acquisitions.

19 Task and resting-state fMRI data were projected onto 2 mm standard CIFTI  
20 grayordinates space, and the multimodal surface matching (MSM) algorithm

1 (Robinson et al. 2014) based on areal features (MSMAll) was used for accurate  
2 inter-subject registration. Acquisition parameters and processing are described in  
3 detail in several publications (Barch et al. 2013; Smith et al. 2013). Briefly, resting  
4 and task fMRI scans were acquired at 2 mm isotropic resolution, with a fast TR  
5 sampling rate at 0.72 s using multiband pulse sequences (Ugurbil et al. 2013). Both  
6 sets of functional data had already been registered to the MNI space (Glasser et al.  
7 2013). Each subject had four 15-minute resting fMRI runs, with a total of 1,200 time  
8 points per run. The resting fMRI data were further pre-processed by FIX to  
9 automatically remove the effect of structured artifacts (Griffanti et al. 2014;  
10 Salimi-Khorshidi et al. 2014).

## 11 **Functional Connectivity profile**

12 We calculated functional connectivity based on the HCP-MMP1.0 (Human  
13 Connectome Project Multi-Modal Parcellation version 1.0) (Glasser et al. 2016) that  
14 containing 360 brain regions. The functional connectivity was calculated from the  
15 resting fMRI data. The four runs of individual resting-state time series data were  
16 concatenated after being demeaned and variance-normalized along the time axis. We  
17 did not apply global signal regression before calculating functional connectivity. The  
18 time series for every vertex in the seed region was correlated with the averaged time  
19 series for each of the remaining 359 target regions. The diagonal elements of the  
20 functional connectivity matrix were set as ones.

## 21 **Gaussian-Gamma mixture model for determining activation threshold**

22 The HCP\_MMP1.0 contains 360 brain regions. Using a connectivity matrix with  
23 size  $360 \times 360$  is likely to overfit the training dataset. Since some brain regions do not  
24 involve in the face recognition process, removing these brain regions beforehand can  
25 reduce the model complexity in a great deal. To prevent some individual differences  
26 with opposite signs from canceling with each other, we calculated each brain region's

1 mean absolute activation across subjects. Then we used the Gaussian-Gamma mixture  
2 distribution (Gorgolewski et al. 2012) to model the density distribution of the mean  
3 absolute activation for the 360 brain regions. The Gaussian distribution is used to  
4 model the random noise effect, and the Gamma distribution is used to model the  
5 activation signal. We set the activation threshold as the point when the probability  
6 density of Gamma distribution is higher than that of Gaussian distribution.

## 7 **Graph neural network for predicting functional face selectivity**

8 Graph neural network is widely used to process data with graph structures  
9 (Defferrard et al. 2016; Kipf and Welling 2017; Veličković et al. 2018). We developed  
10 a graph neural network that is adapted to process brain connectivity network data (Fig.  
11 1B). The graph neural network with a single-layer can be represented in a matrix form  
12 as follows:

$$13 \quad H_{n \times 1}^k = W_{n \times n}^k \odot A_{n \times n} X_{n \times 1}^{k-1} + B_{n \times 1}^k \quad (1)$$

14  $k$  represents the  $k$ -th layer of the network.  $n$  represents the number of nodes in the  
15 graph neural network, i.e. the number of brain regions.  $X$  and  $H$  respectively  
16 represent the input and output of the graph neural network, i.e. the functional  
17 activation of each brain region.  $B$  represents the bias term of the model.  $A$   
18 represents the adjacency matrix composed of functional connectivity.  $W$  represents  
19 the functional information propagation coefficient of each functional connectivity  
20 pathways.  $W$  exerts on  $A$  via the operation  $\odot$  that represents the element-wise  
21 multiplication. A multi-layers computation can be achieved by applying formula (1)  
22 repetitively. When one trains a multi-layers graph neural network, the vanishing  
23 gradient effect usually occurs. Inspired by the residue neural network (He et al. 2016),  
24 we added residue connections between neighboring layers to formula (1) and the  
25 resulting model is:

$$26 \quad H_{n \times 1}^k = W_{n \times n}^k \odot A_{n \times n} X_{n \times 1}^{k-1} + B_{n \times 1}^k + X_{n \times 1}^{k-1} \quad (2)$$

1 To make the 1-layer graph neural network model consistent with the linear model  
2 adopted by previous studies, the brain region's activation in the 0th layer is initialized  
3 as all ones:  $X_{n \times 1}^0 = [1, 1, \dots, 1]_{n \times 1}$ . It is worth noting that model (2) doesn't involve  
4 nonlinear activation functions but is nonlinear in the sense that the functional  
5 connectivity feature  $A$  occurs in every computation layer. Therefore the resulting  
6 multi-layers model contains nonlinear features that represent functional information  
7 passing through multi-steps functional connectivity pathways.

## 8 **Metrics for assessing the model**

9 We used two metrics to assess the model performance on testing data. Denote the  
10 target value by  $y$  and the prediction value by  $\hat{y}$ . The sum squared error  
11 (SSE) =  $\sum_i (y_i - \hat{y}_i)^2$  is widely used to assess the difference between the target and  
12 prediction values. But in different divisions of the dataset, the variance of the target  
13 value is different, thus the SSE cannot be compared across different divisions. We  
14 divided the SSE by the sum squared total (SST) =  $\sum_i (y_i - \text{mean}(y))^2$  and the  
15 resulted normalized squared error (NSE) was used. We also adopted the Pearson  
16 correlation to assess the similarity between the actual and prediction value, denoted  
17 by  $r$ . Under the least squares condition, NSE represents the error proportion that  
18 cannot be explained by the model, and  $r^2$  represents the proportion of target data  
19 that can be explained by the model. Since the least squares condition is not satisfied  
20 by our model, these two metrics only serve as approximations.

21 Prediction similarity assessed by the Pearson correlation coefficient was Fisher's  
22  $z$  transformed when used for further statistical tests. Since the evaluation metrics for  
23 different models were paired for each random division of the dataset, we performed  
24 paired-sample  $t$ -tests using the custom Matlab command "ttest".

## 25 **Implementation details**

26 The whole dataset was randomly divided into a training set and a testing set with  
27 a ratio of nine to one. Though the sample size 997 is relatively large in neuroimaging,



1 it is rather small compared to that of computer vision datasets in machine learning that  
2 usually contain over ten thousand samples. The random splitting of a small dataset  
3 can introduce random effects into the final results, i.e. the metrics for assessing the  
4 model can vary widely across different divisions. To remove the random effect as  
5 much as possible, we performed the prediction process 100 times with different  
6 random divisions of the dataset and used the mean of the two metrics to assess the  
7 model.

8 We implemented the graph neural network with PyTorch (<https://pytorch.org/>).  
9 The parameters of the model were initialized by the Xavier normal distribution with a  
10 gain of 0.1. The model was trained via the stochastic gradient descent optimizer with  
11 a Nesterov momentum of 0.9 used. The training batch size was 128 and 500 training  
12 epochs were used. The initial learning rate was 0.01 and a 0.1 multiplicative factor of  
13 learning rate decay was set at 300 and 400 epochs respectively. To further overcome  
14 the problem of overfitting caused by a small sample size, we added Gaussian random  
15 noise to the individual connectivity features at each training step. The variance of the  
16 Gaussian random noise was set equal to the variance of each connectivity feature  
17 across subjects. This technique can be viewed as a kind of online data augmentation.  
18 The graph neural network models were trained on an NVIDIA GeForce GTX 1080 Ti  
19 graphic processing unit. The training time for each random separation lasts about 8  
20 minutes, and the total training time for 100 random separations lasts about 13 hours.

## 21 **Data availability**

22 The HCP S1200 data release is publicly available online at <https://www.human>  
23 [connectome.org/](https://www.humanconnectome.org/).

# 1 Results

## 2 Functional face ROI localization

3 We selected the rFFA as the ROI, given that this region is the most selective in  
4 the face processing network (Kanwisher et al. 1997). It is advantageous to study  
5 individual differences by choosing a region that has a specialized function and is  
6 reliably replicated across studies and participants. We identified the rFFA by the right  
7 fusiform face complex (rFFC) region in the HCP-MMP1.0 (Glasser et al. 2016). The  
8 FACES-SHAPES task contrast for the HCP emotion paradigm and the FACE-AVG  
9 task contrast for the HCP working memory paradigm were separately used to identify  
10 the functional face response. We showed the group average  $z$ -statistics of these two  
11 task contrasts and the boundary of rFFC region in Fig. 2A. The rFFC region was  
12 identified in both task contrasts, and the boundary of rFFC region coincided well with  
13 that of the group average activation. The mean  $z$ -statistic within the rFFC region was  
14 used to assess each subject's face selectivity.

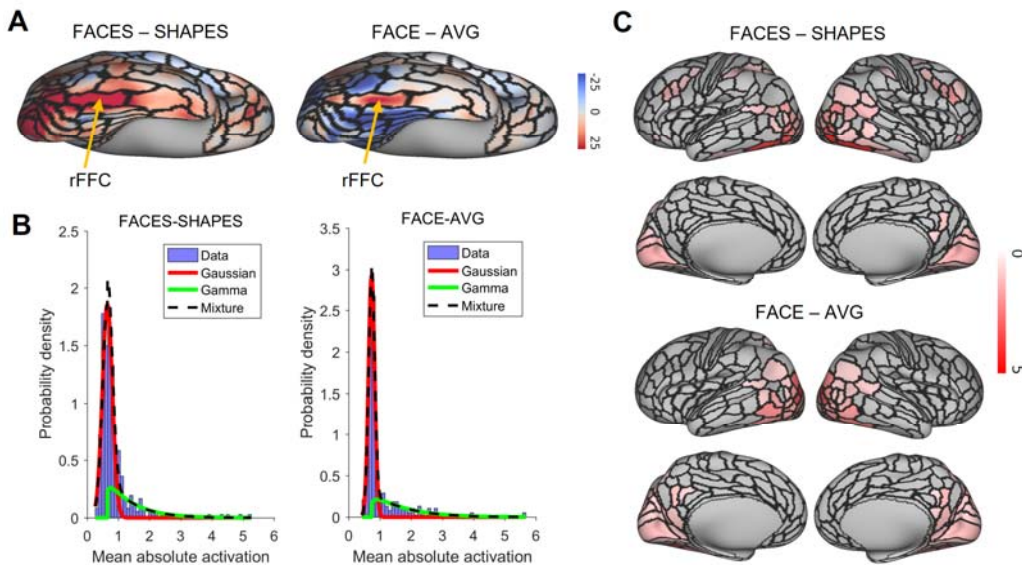

15

16 Figure 2. Functional face ROI localization and network selection. (A) Voxel-wise  
17 group average  $z$ -statistics of both contrasts were shown. The yellow arrow indicates  
18 the area where the rFFC region locates. (B) The purple histogram indicates the density

1 distribution of the mean absolute activation for the 360 brain regions. A Gaussian (red  
2 curve)-Gamma (green curve) mixture (black curve) model was used to fit the data. (C)  
3 Mean absolute  $z$ -statistics of brain regions in the functional face activation network  
4 were shown.

### 5 **Functional face activation network selection**

6 We next defined the functional face activation network in preparation for  
7 constructing the graph neural network. Fig. 2B shows the density distribution of the  
8 mean absolute activation for the 360 brain regions. We used a Gaussian-Gamma  
9 mixture model to fit the density distribution. The threshold of the activation network  
10 was chosen when the probability of Gamma distribution surpassed that of Gaussian  
11 distribution. We showed the activation networks of both task contrasts in Fig. 2C.  
12 Networks of both task contrasts mainly include brain regions in the visual cortices,  
13 such as the primary and early visual cortices, dorsal and ventral stream visual cortices,  
14 MT+ complex and neighboring visual areas. Both networks also include medial and  
15 lateral temporal cortices, superior and inferior parietal cortices,  
16 temporo-parieto-occipital junction, and posterior cingulate. In addition, the activation  
17 network of FACES-SHAPES contrast also includes inferior frontal, orbital and polar  
18 frontal, dorsolateral prefrontal, and premotor cortices. The activation network of  
19 FACES-SHAPES contrast is broader than that of FACE-AVG contrast, because the  
20 activation network of FACE-AVG contrast is mainly for basic face perception, while  
21 the activation network of FACES-SHAPES contrast also includes emotional  
22 processing of faces.

### 23 **Statistical validation of graph neural network prediction model**

24 After selecting the functional face activation network, we constructed graph  
25 neural networks to predict individual face selectivity of the rFFC region. We first  
26 compared the 2-layers graph neural network with the random permutation model to

1 validate the prediction model statistically. The random permutation model was  
2 constructed with the same structure as the 2-layers graph neural network, except that  
3 the pairings between the functional connectivity network and the response of rFFC  
4 region was shuffled. We illustrated the comparison between the 2-layers graph neural  
5 network and the random permutation model in Fig. 3A. For the FACES-SHAPES  
6 contrast, the prediction error of the 2-layers graph neural network is significantly ( $t(99)$   
7 = -26.5,  $p = 9.5 \times 10^{-47}$ , paired-sample  $t$ -test) lower than that of the random permutation  
8 model, and the prediction similarity of the 2-layers graph neural network is  
9 significantly ( $t(99) = 33.2$ ,  $p = 1.7 \times 10^{-55}$ , paired-sample  $t$ -test) higher than that of the  
10 random permutation model. Results for the FACE-AVG contrast are similar (see  
11 Supplementary Table S1). Hence, the 2-layers graph neural network can capture the  
12 association between the individual functional connectivity network and the face  
13 selectivity of rFFC region above random level.

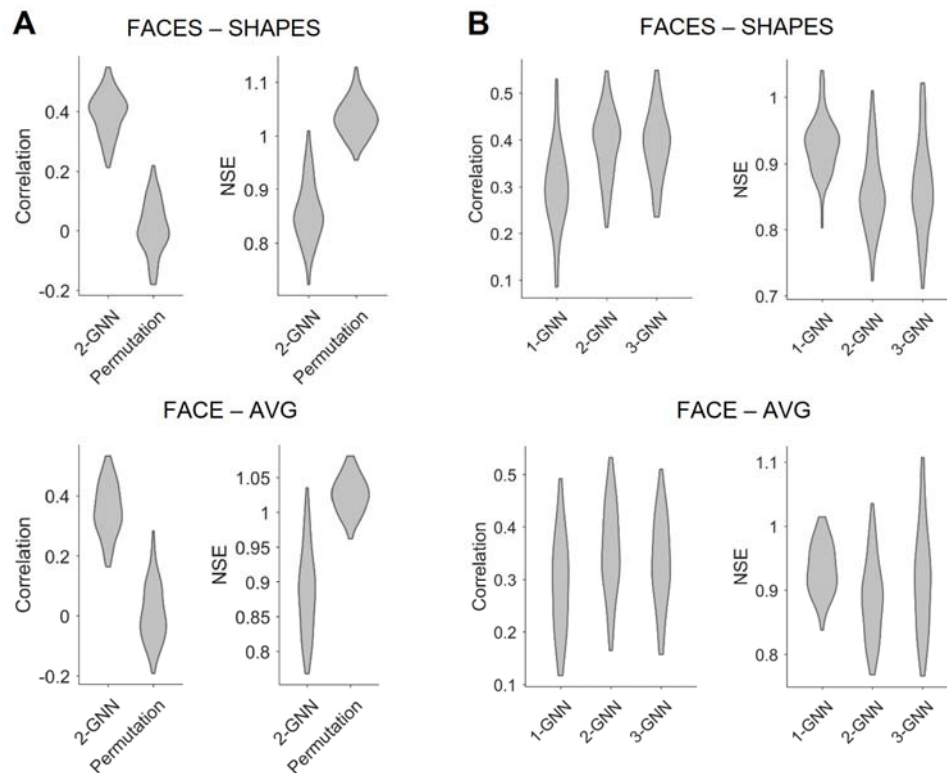

14

15 Figure 3. Comparison of prediction metrics for different models. (A) Comparison  
16 between the 2-layers graph neural network (2-GNN) and the random permutation

1 model with the same structure. The prediction performance of 2-GNN is better than  
2 that of random permutation model in that the 2-GNN has a higher prediction  
3 similarity (assessed by correlation) and a lower prediction error (assessed by NSE). (B)  
4 Comparison of graph neural networks with different layers. The 2-GNN has a higher  
5 ability to predict better individual differences than both the 1-GNN and 3-GNN.

## 6 **Comparison of graph neural networks with different layers**

7 After validating the graph neural network statistically, we further tested our  
8 proposed assumption by comparing graph neural networks with different layers. The  
9 1-layer graph neural network corresponds to the linear prediction model adopted by  
10 previous studies and utilizes the 1-hop (i.e., direct) functional connectivity of the  
11 rFFC region to predict the rFFC region's individual functional face response. In the  
12 2-layers graph neural network, the final layer corresponds to the 1-hop functional  
13 connectivity representation of the rFFC region's face response, and the first layer  
14 corresponds to the 2-hop functional connectivity representation of the rFFC region's  
15 face response. Thus, the multi-layers graph neural network contains the representation  
16 of the rFFC region's face response through multi-hops functional connectivity. If the  
17 proposal that a brain region's function is represented by the multi-hops connectivity is  
18 rational, using multi-hops functional connectivity should improve the prediction of  
19 the rFFC region's face response. We determined the rational number of hops based on  
20 the generalization ability of the graph neural networks with different number of layers  
21 and showed the comparison results in Fig. 3B and Supplementary Table S1. For the  
22 FACES-SHAPES contrast, the prediction error of the 2-layers graph neural network  
23 (mean NSE = 0.857) is significantly ( $t(99) = -16.0, p = 3.0 \times 10^{-29}$ , paired-sample  $t$ -test)  
24 lower than that of the 1-layer graph neural network (mean NSE = 0.927), but is not  
25 very significantly ( $t(99) = -2.09, p = 0.039$ , paired-sample  $t$ -test) lower than that of the  
26 3-layers graph neural network (mean NSE = 0.864). The prediction similarity of the  
27 2-layers graph neural network (mean correlation = 0.392) is significantly ( $t(99) = 13.5$ ,

1  $p = 2.8 \times 10^{-24}$ , paired-sample  $t$ -test) higher than that of the 1-layer graph neural  
2 network (mean correlation = 0.296), but is not significantly ( $t(99) = 0.269$ ,  $p = 0.788$ ,  
3 paired-sample  $t$ -test) higher than that of the 3-layers graph neural network (mean  
4 correlation = 0.391). Results for the FACE-AVG contrast are similar, except that the  
5 differences between the 2-layers and 3-layers graph neural networks are significant  
6 (see Supplementary Table S1). Since the evaluation metrics stopped improving, we  
7 only tested graph neural networks with the number of layers up to 3. Overall, the  
8 multi-layers graph neural network improves the prediction performance in individual  
9 face selectivity of the rFFC region, and the 2-layers graph neural network possessed  
10 the best prediction performance.

### 11 **Functional network pathways involving face selectivity**

12 In the previous section, we determined that the 2-layers graph neural network has  
13 the best generalization ability, thus the functional network pathways containing the  
14 rFFC region's 1-hop and 2-hop functional connectivity best characterize the  
15 individual functional face selectivity of the rFFC region. Fig. 4 depicts the 2-hop  
16 functional connectivity network involving face selectivity. The 2-hop functional  
17 connectivity network also contains information about the 1-hop functional  
18 connectivity, because the output of the first layer is subsequently used as the input of  
19 the second layer. The 2-hop functional connectivity network is not symmetrical. The  
20 rows represent brain regions that integrate functional information from neighboring  
21 regions, and the columns represent brain regions that send functional information out.  
22 In both task contrasts, connectivity coefficients with large absolute values mainly  
23 concentrate in the rows of ventral stream visual cortices and MT+ complex visual  
24 areas. This result indicates that brain regions in these two cortices mainly participate  
25 in the computation of the following layer. Though some brain regions in other rows  
26 do not have large absolute connectivity coefficients, these regions in the columns have  
27 large absolute connectivity coefficients. This result indicates that some brain regions

1 do not integrate functional information for the following layer, but they send  
2 functional information out to the regions that integrate functional information. The  
3 whole results suggest a hierarchical functional face processing mechanism for the  
4 rFFC region. The rFFC region first mainly integrates functional information from  
5 regions in the ventral stream visual cortices and MT+ complex visual areas, then  
6 regions in these two cortices integrate functional information from regions in other  
7 cortices.

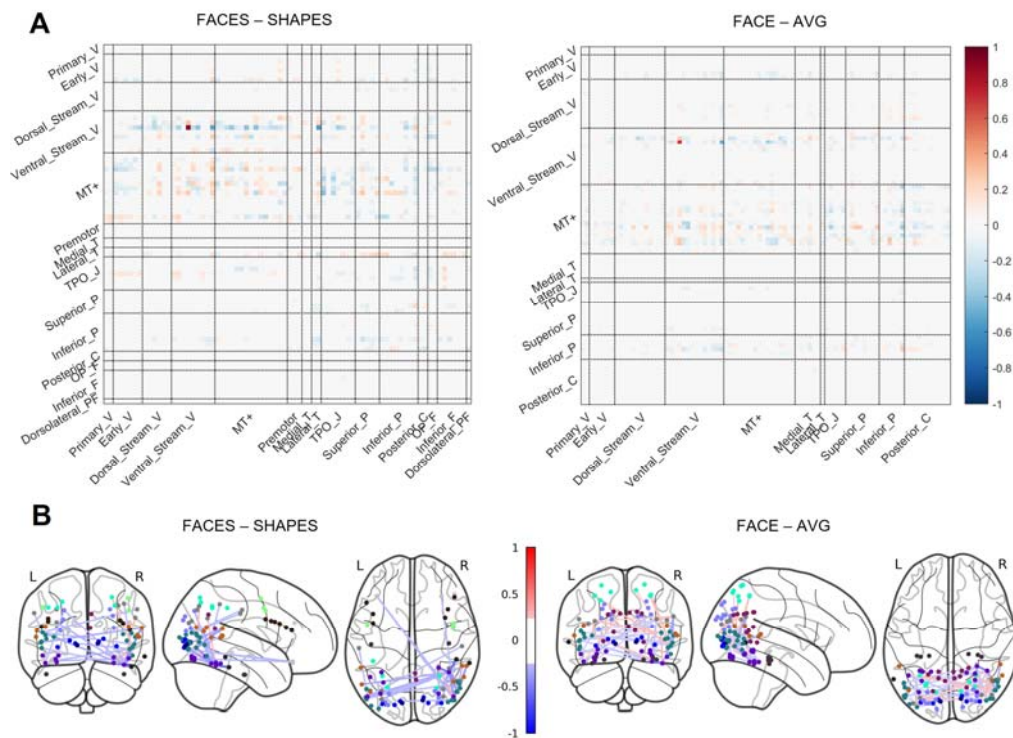

8  
9 Figure 4. Visualization of connectivity pathways involving face selectivity. (A) The  
10 functional network involving face selectivity is shown in a matrix plot. Color  
11 represents the coefficient strength of each connection. Brain regions that belong to the  
12 same cortex are grouped. Full names of cortices are included in Supplementary Table  
13 S2. (B) The functional network is plotted on the glass brain. Only the connection with  
14 the top 1% coefficient strength is shown to make the plot clean. Edge color represents  
15 the coefficient strength of each connection. Node color represents the cortices that  
16 each brain region belongs to (see Supplementary Fig. S1).

## 1 **Discussion**

2        In order to better characterize the brain region's function of individuals, our study  
3 proposed that a brain region's function is represented by the multi-hops connectivity  
4 profiles. The multi-layers graph neural network model was used to incorporate  
5 multi-hops connectivity features in the functional connectivity network. We tested our  
6 proposal by predicting the functional face response of the rFFC region via the rFFC  
7 region's multi-hops functional connectivity. Our results showed that the 2-hops  
8 functional connectivity profile has the best generalization ability in characterizing the  
9 rFFC region's individual functional face response, and revealed a hierarchical  
10 network for the rFFC region's functional face processing mechanism. The current  
11 study provides new insights into understanding the brain region's function from a  
12 network perspective.

13        Previous researchers proposed that a brain region's function is represented by the  
14 1-hop connectivity profiles (Passingham et al. 2002). However, this proposal neglects  
15 individual differences in the functional information of ROIs' neighboring regions.  
16 Under our proposal that a brain region's function is represented by the multi-hops  
17 connectivity profiles, individual differences in the 1-hop brain region's functional  
18 information are taken into consideration via the 2-hop connectivity profiles. Our  
19 proposal is also consistent with neuroscience findings. Researchers have suggested  
20 that brain functions do not rely on the independent operation of a single brain region  
21 or connectivity pathway, but derive from the brain network composed of multiple  
22 brain regions and connectivity pathways (McIntosh 2000; Misic and Sporns 2016). In  
23 addition, indirect connectivity features among other brain regions can also affect ROIs  
24 via the brain network (Honey et al. 2009). Brain navigation efficiency is also due to  
25 multi-hop brain connectivity pathways (Seguin et al. 2018). In a word, since the  
26 multi-hop connectivity encodes the topological and geometrical properties of the brain  
27 connectivity network, our proposal indicates that a brain region's function is encoded



1 in the topology of the brain connectivity network.

2 The multi-layers graph neural network perfectly matches our proposal, since the  
3 multi-layers convolution computations characterize the propagation of functional  
4 information among the brain connectivity network. Though some kinds of graph  
5 neural network models have been developed to process brain network data (Ktena et al.  
6 al. 2018; Parisot et al. 2018; Yang et al. 2019), our proposed graph neural network is  
7 novel in the following aspect. As opposed to these graph neural networks (Ktena et al.  
8 2018; Parisot et al. 2018; Yang et al. 2019) that impose parameters on node features,  
9 our graph neural network directly imposes parameters on connectivity features instead.  
10 Imposing parameters on connectivity features is especially beneficial when the  
11 dimension of node features is very low, as it is the case that the node feature, i.e. the  
12 brain activation statistic, has only one dimension in our study. Hence, our graph  
13 neural network is well suitable for handling connectivity-driven problems, while the  
14 others mainly aim at dealing with node-driven problems.

15 The functional connectivity network has also been verified to transfer functional  
16 information across cortical regions (Cole et al. 2016; Ito et al. 2017). Under this  
17 activity flow mapping, functional activation information is transferred to neighboring  
18 brain regions via functional connectivity pathways. The activity flow mapping shares  
19 certain similarities with our study in the sense that the functional information  
20 propagates within the functional connectivity network. However, our study differs  
21 from the activity flow framework mainly in that functional activation information of  
22 all brain regions in our study is unknown, while only the ROI's functional activation  
23 information is unknown in the activity flow framework. In this sense, our proposal  
24 and study require less functional information of brain regions and thus has practical  
25 implications in that one does not need to scan functional task contrasts beforehand to  
26 get the functional information of some brain regions.

27 Our results showed that the 2-layers graph neural network containing 1-hop and  
28 2-hop functional connectivity best characterizes the rFFC region's functional face

1 response, indicating that 2-hops connectivity information may be enough to estimate  
2 the rFFC region's function. On the other hand, from the computation perspective, as  
3 the number of layers in a graph neural network gets large, the parameters and  
4 complexity of the model also enlarge. Since the sample size is relatively limited  
5 compared to that of datasets in machine learning, models with large complexity are  
6 also likely to overfit the data and thus have a poor generalization ability. Future work  
7 involves utilizing datasets with a large sample size to test whether graph neural  
8 networks with more layers can further improve the generalization ability.

9 We chose the rFFC region that has a specialized function and is reliably  
10 replicated across studies to test our assumption primarily. However, the rFFC region  
11 is specialized in the face selectivity function which has special meaning in the human  
12 evolution process and has a specific neural mechanism (Tsao et al. 2006; Freiwald and  
13 Tsao 2014). Whether our proposal can be generalized to brain regions beyond the  
14 rFFC still remains to be solved, especially to brain regions that are more functionally  
15 variable across individuals and flexible across tasks, i.e. the heteromodal association  
16 cortices (Anderson et al. 2013; Mueller et al. 2013; Tei et al. 2017). Future work also  
17 includes extension to brain regions involving a wide functional domains to test our  
18 proposal.

19 We used undirected functional connectivity to construct the brain connectivity  
20 network in this study. However, the propagation of functional information in the brain  
21 is actually directional, and this directional information was not taken into account.  
22 Effective connectivity should be considered in the future to capture the directionality  
23 of information transfer. In addition, there are also other choices to construct the brain  
24 connectivity network, such as the structural connectivity representing white matter  
25 fiber pathways. Researchers can also explore the relationship between the multi-hops  
26 structural connectivity network and the individual brain region's function.

27 In conclusion, we proposed that the multi-hops connectivity profile can improve  
28 the prediction performance of individual differences in the brain region's function.

1 Results revealed that the 2-hops functional connectivity network best characterizes the  
2 rFFC region's individual functional face response. This advancement contributes to  
3 understanding the mechanism of individual brain region's function in terms of the  
4 brain network and provides a new perspective on brain functional processing  
5 mechanisms at the network level.

6

7 **Conflict of interest:** The authors declare that they have no conflict of interest.

8

9 **Acknowledgments:** This work was supported by the National Key Research and  
10 Development Program of China (grant No. 2017YFB1002504). Data were provided  
11 by the Human Connectome Project, WU-Minn Consortium (Principal Investigators:  
12 David Van Essen and Kamil Ugurbil; 1U54MH091657) funded by the 16 NIH  
13 Institutes and Centers that support the NIH Blueprint for Neuroscience Research.

14

15 **Author contributions/Authorship:** Wu, Li and Feng designed the research, Wu  
16 performed the data analysis, Wu, Li and Feng wrote and revised the paper.

17

## 18 Reference

19 Anderson ML, Kinnison J, Pessoa L. 2013. Describing functional diversity of brain regions  
20 and brain networks. *Neuroimage*. 73:50-58.

21 Barch DM, Burgess GC, Harms MP, Petersen SE, Schlaggar BL, Corbetta M, Glasser MF,  
22 Curtiss S, Dixit S, Feldt C et al. 2013. Function in the human connectome: task-fMRI  
23 and individual differences in behavior. *Neuroimage*. 80:169-189.

24 Beckmann M, Johansen-Berg H, Rushworth MF. 2009. Connectivity-based parcellation of  
25 human cingulate cortex and its relation to functional specialization. *J Neurosci*.  
26 29:1175-1190.

27 Cohen AL, Fair DA, Dosenbach NU, Miezin FM, Dierker D, Van Essen DC, Schlaggar BL,  
28 Petersen SE. 2008. Defining functional areas in individual human brains using resting  
29 functional connectivity MRI. *Neuroimage*. 41:45-57.

30 Cole MW, Ito T, Bassett DS, Schultz DH. 2016. Activity flow over resting-state networks

- 1 shapes cognitive task activations. *Nat Neurosci.* 19:1718-1726.
- 2 Defferrard M, Bresson X, Vandergheynst P editors. Convolutional neural networks on graphs  
3 with fast localized spectral filtering, *Advances in neural information processing systems*;  
4 2016. 3844-3852 p.
- 5 Freiwald WA, Tsao DY. 2014. Neurons that keep a straight face. *Proc Natl Acad Sci U S A.*  
6 111:7894-7895.
- 7 Glasser MF, Coalson TS, Robinson EC, Hacker CD, Harwell J, Yacoub E, Ugurbil K,  
8 Andersson J, Beckmann CF, Jenkinson M et al. 2016. A multi-modal parcellation of  
9 human cerebral cortex. *Nature.* 536:171-178.
- 10 Glasser MF, Sotiropoulos SN, Wilson JA, Coalson TS, Fischl B, Andersson JL, Xu J, Jbabdi S,  
11 Webster M, Polimeni JR et al. 2013. The minimal preprocessing pipelines for the Human  
12 Connectome Project. *Neuroimage.* 80:105-124.
- 13 Gordon EM, Laumann TO, Adeyemo B, Huckins JF, Kelley WM, Petersen SE. 2016.  
14 Generation and Evaluation of a Cortical Area Parcellation from Resting-State  
15 Correlations. *Cereb Cortex.* 26:288-303.
- 16 Gorgolewski KJ, Storkey AJ, Bastin ME, Pernet CR. 2012. Adaptive thresholding for reliable  
17 topological inference in single subject fMRI analysis. *Front Hum Neurosci.* 6:245.
- 18 Griffanti L, Salimi-Khorshidi G, Beckmann CF, Auerbach EJ, Douaud G, Sexton CE, Zsoldos  
19 E, Ebmeier KP, Filippini N, Mackay CE. 2014. ICA-based artefact removal and  
20 accelerated fMRI acquisition for improved resting state network imaging. *Neuroimage.*  
21 95:232-247.
- 22 He K, Zhang X, Ren S, Sun J editors. Deep residual learning for image recognition,  
23 *Proceedings of the IEEE conference on computer vision and pattern recognition*; 2016.  
24 770-778 p.
- 25 Honey CJ, Sporns O, Cammoun L, Gigandet X, Thiran JP, Meuli R, Hagmann P. 2009.  
26 Predicting human resting-state functional connectivity from structural connectivity. *Proc*  
27 *Natl Acad Sci U S A.* 106:2035-2040.
- 28 Ito T, Kulkarni KR, Schultz DH, Mill RD, Chen RH, Solomyak LI, Cole MW. 2017.  
29 Cognitive task information is transferred between brain regions via resting-state network  
30 topology. *Nat Commun.* 8:1027.
- 31 Johansen-Berg H, Behrens TE, Robson MD, Drobnyak I, Rushworth MF, Brady JM, Smith  
32 SM, Higham DJ, Matthews PM. 2004. Changes in connectivity profiles define  
33 functionally distinct regions in human medial frontal cortex. *Proc Natl Acad Sci U S A.*  
34 101:13335-13340.
- 35 Kanwisher N, McDermott J, Chun MM. 1997. The fusiform face area: a module in human  
36 extrastriate cortex specialized for face perception. *J Neurosci.* 17:4302-4311.
- 37 Kipf TN, Welling M editors. Semi-supervised classification with graph convolutional  
38 networks, *International Conference on Learning Representations*; 2017.

- 1 Ktena SI, Parisot S, Ferrante E, Rajchl M, Lee M, Glocker B, Rueckert D. 2018. Metric  
2 learning with spectral graph convolutions on brain connectivity networks. *Neuroimage*.  
3 169:431-442.
- 4 Mars RB, Passingham RE, Jbabdi S. 2018. Connectivity Fingerprints: From Areal  
5 Descriptions to Abstract Spaces. *Trends Cogn Sci*. 22:1026-1037.
- 6 McIntosh AR. 2000. Towards a network theory of cognition. *Neural Netw*. 13:861-870.
- 7 Misic B, Sporns O. 2016. From regions to connections and networks: new bridges between  
8 brain and behavior. *Curr Opin Neurobiol*. 40:1-7.
- 9 Mueller S, Wang D, Fox MD, Yeo BT, Sepulcre J, Sabuncu MR, Shafee R, Lu J, Liu H. 2013.  
10 Individual variability in functional connectivity architecture of the human brain. *Neuron*.  
11 77:586-595.
- 12 Osher DE, Saxe RR, Koldewyn K, Gabrieli JD, Kanwisher N, Saygin ZM. 2016. Structural  
13 Connectivity Fingerprints Predict Cortical Selectivity for Multiple Visual Categories  
14 across Cortex. *Cereb Cortex*. 26:1668-1683.
- 15 Parisot S, Ktena SI, Ferrante E, Lee M, Guerrero R, Glocker B, Rueckert D. 2018. Disease  
16 prediction using graph convolutional networks: Application to Autism Spectrum  
17 Disorder and Alzheimer's disease. *Med Image Anal*. 48:117-130.
- 18 Parker Jones O, Voets N, Adcock J, Stacey R, Jbabdi S. 2017. Resting connectivity predicts  
19 task activation in pre-surgical populations. *Neuroimage Clin*. 13:378-385.
- 20 Passingham RE, Stephan KE, Kotter R. 2002. The anatomical basis of functional localization  
21 in the cortex. *Nat Rev Neurosci*. 3:606-616.
- 22 Robinson EC, Jbabdi S, Glasser MF, Andersson J, Burgess GC, Harms MP, Smith SM, Van  
23 Essen DC, Jenkinson M. 2014. MSM: a new flexible framework for Multimodal Surface  
24 Matching. *Neuroimage*. 100:414-426.
- 25 Salimi-Khorshidi G, Douaud G, Beckmann CF, Glasser MF, Griffanti L, Smith SM. 2014.  
26 Automatic denoising of functional MRI data: combining independent component  
27 analysis and hierarchical fusion of classifiers. *Neuroimage*. 90:449-468.
- 28 Saygin ZM, Osher DE, Augustinack J, Fischl B, Gabrieli JDE. 2011a. Connectivity-based  
29 segmentation of human amygdala nuclei using probabilistic tractography. *Neuroimage*.  
30 56:1353-1361.
- 31 Saygin ZM, Osher DE, Koldewyn K, Reynolds G, Gabrieli JD, Saxe RR. 2011b. Anatomical  
32 connectivity patterns predict face selectivity in the fusiform gyrus. *Nat Neurosci*.  
33 15:321-327.
- 34 Saygin ZM, Osher DE, Norton ES, Youssoufian DA, Beach SD, Feather J, Gaab N, Gabrieli  
35 JD, Kanwisher N. 2016. Connectivity precedes function in the development of the visual  
36 word form area. *Nat Neurosci*. 19:1250-1255.
- 37 Seguin C, Van Den Heuvel MP, Zalesky A. 2018. Navigation of brain networks. *Proc Natl*  
38 *Acad Sci U S A*. 115:6297-6302.

- 1 Smith SM, Beckmann CF, Andersson J, Auerbach EJ, Bijsterbosch J, Douaud G, Duff E,  
2 Feinberg DA, Griffanti L, Harms MP et al. 2013. Resting-state fMRI in the Human  
3 Connectome Project. *Neuroimage*. 80:144-168.
- 4 Tavor I, Parker Jones O, Mars RB, Smith SM, Behrens TE, Jbabdi S. 2016. Task-free MRI  
5 predicts individual differences in brain activity during task performance. *Science*.  
6 352:216-220.
- 7 Tei S, Fujino J, Kawada R, Jankowski KF, Kauppi JP, van den Bos W, Abe N, Sugihara G,  
8 Miyata J, Murai T et al. 2017. Collaborative roles of Temporoparietal Junction and  
9 Dorsolateral Prefrontal Cortex in Different Types of Behavioural Flexibility. *Sci Rep*.  
10 7:6415.
- 11 Tomassini V, Jbabdi S, Klein JC, Behrens TE, Pozzilli C, Matthews PM, Rushworth MF,  
12 Johansen-Berg H. 2007. Diffusion-weighted imaging tractography-based parcellation of  
13 the human lateral premotor cortex identifies dorsal and ventral subregions with  
14 anatomical and functional specializations. *J Neurosci*. 27:10259-10269.
- 15 Tsao DY, Freiwald WA, Tootell RB, Livingstone MS. 2006. A cortical region consisting  
16 entirely of face-selective cells. *Science*. 311:670-674.
- 17 Ugurbil K, Xu JQ, Auerbach EJ, Moeller S, Vu AT, Duarte-Carvajalino JM, Lenglet C, Wu XP,  
18 Schmitter S, Van de Moortele PF et al. 2013. Pushing spatial and temporal resolution for  
19 functional and diffusion MRI in the Human Connectome Project. *Neuroimage*.  
20 80:80-104.
- 21 Veličković P, Cucurull G, Casanova A, Romero A, Lio P, Bengio Y editors. Graph attention  
22 networks, International Conference on Learning Representations; 2018.
- 23 Wu D, Fan L, Song M, Wang H, Chu C, Yu S, Jiang T. 2020. Hierarchy of  
24 Connectivity–Function Relationship of the Human Cortex Revealed through Predicting  
25 Activity across Functional Domains. *Cereb Cortex*.
- 26 Yang H, Li X, Wu Y, Li S, Lu S, Duncan JS, Gee JC, Gu S editors. Interpretable  
27 Multimodality Embedding of Cerebral Cortex Using Attention Graph Network for  
28 Identifying Bipolar Disorder, International Conference on Medical Image Computing  
29 and Computer-Assisted Intervention; 2019:Springer. 799-807 p.
- 30
